# Supplementary material for: Acid and multivalent ion resistance of thin film nanocomposite RO membranes loaded with silicalite-1 nanozeolites
Source: Royal Society of Chemistry journal article supplement (doi:10.1039/c3ta12199b), 2013-01-01
Supplement: c3ta12199b.pdf [file c3ta12199b.pdf]

## Support Information

The crystalline structure characterized by XRD patterns are presented in Fig. 1a (NaA) and Fig. 1b (Silicalite-1). It's confirmed that synthesized zeolites are standard NaA and Silicalite-1, respectively, since the results is consistent with previous related literature<sup>1,2</sup>.

The morphology of synthesized zeolites are showed in Fig. 1c (NaA) and Fig. 1d (Silicalite-1). Both micrographs demonstrate that NaA and Silicalite-1 nanzeolites appear in a near spherical shape. To ensure that nanocrystals can be enclosed in polymer matrix, size distribution of two kinds zeolites are tailored to 50nm-150nm (by adjusting synthesis temperature) as showed in SEM images because ultra-thin PA film by interfacial polymerization is always 100-200nm in thickness.

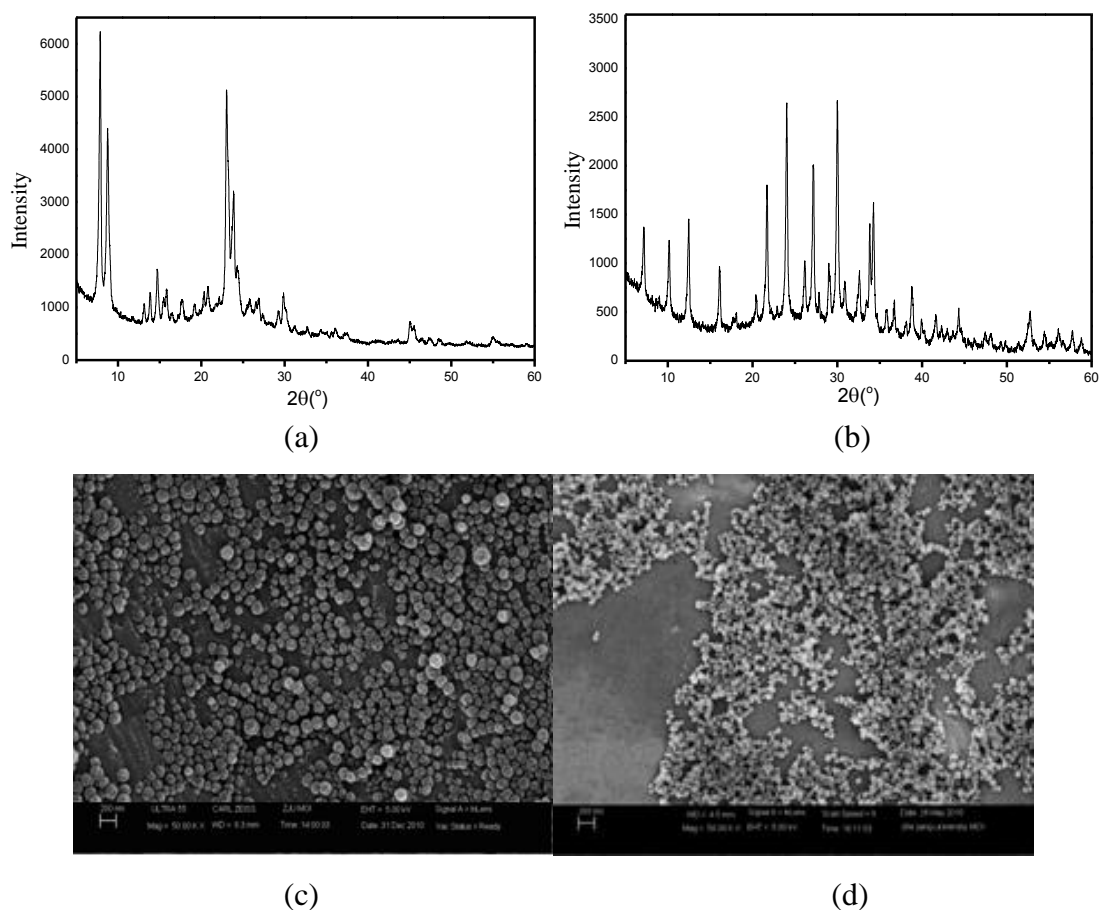

**Fig. 1.** SEM images of (a) NaA zeolites, (b) Silicalite-1 zeolites and XRD pattern of NaA (c) and Silicalite-1(d)

The morphology of different membranes integrated with two kinds of nanozeolites in varied loading amount is also characterized by SEM detection in Fig.2 and Fig.3.

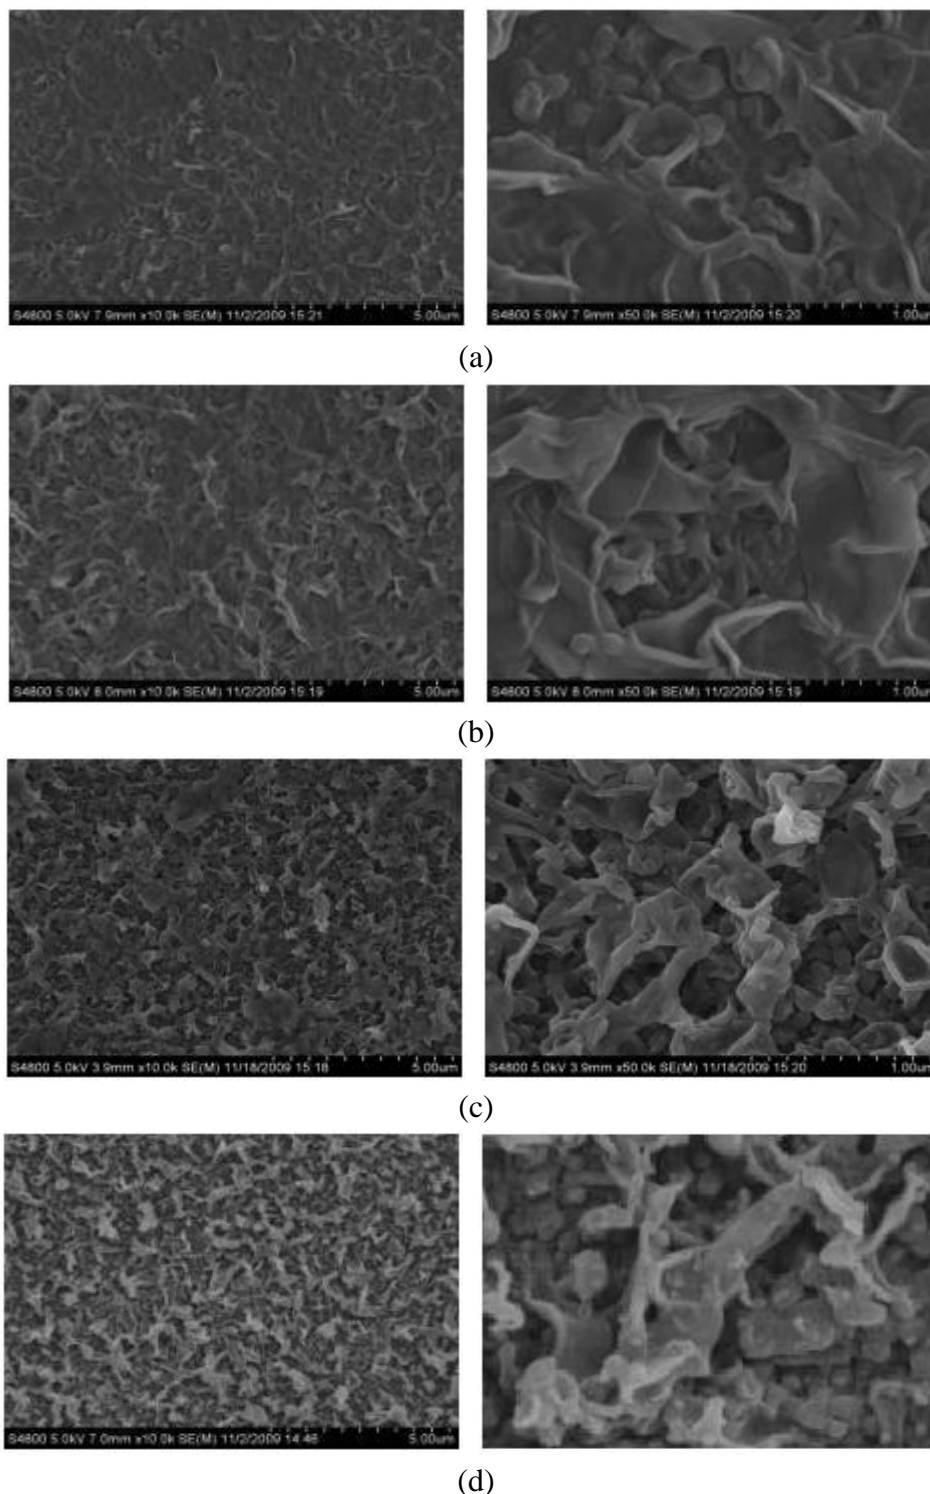

**Fig.2** Effect of NaA zeolite loading on the TFN membrane morphology (a)0.012 wt%  
(b)0.05 wt% (c)0.1 wt% (d)0.2 wt%

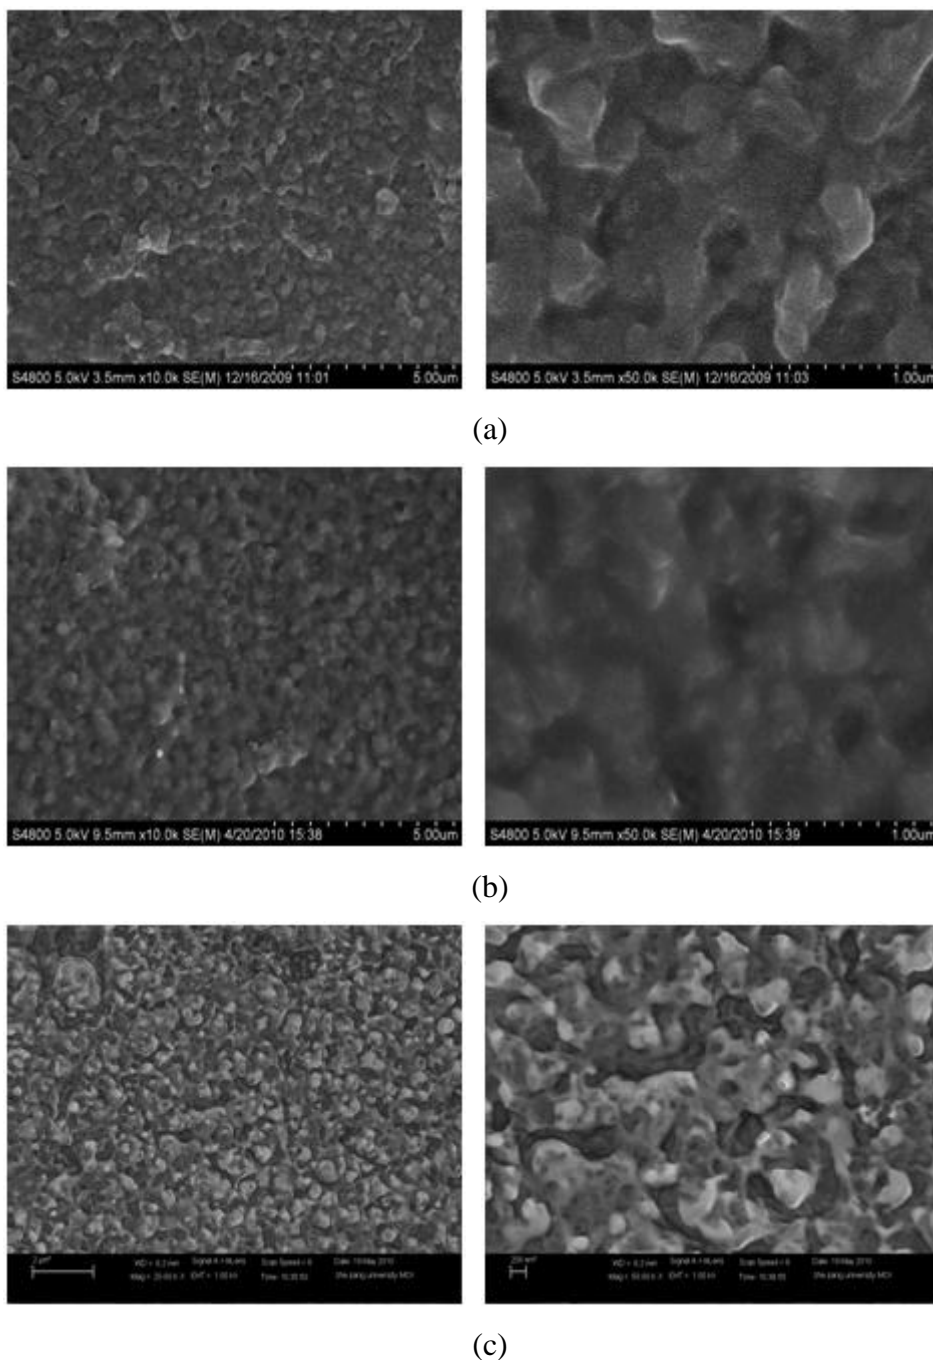

**Fig.3** Effect of Silicalite-1 zeolite loading on the TFN membrane morphology (a) 0.012 wt% (b) 0.05 wt% (c) 0.1wt% (d) 0.2 wt%

## References

1. C. Yu, C. Zhong, Y. Liu, X. Gu, G. Yang, W. Xing and N. Xu, *Chemical Engineering Research & Design*, 2012, **90**, 1372-1380.
2. Y.-Q. Deng, S.-F. Yin and C.-T. Au, *Industrial & Engineering Chemistry Research*, 2012, **51**, 9492-9499.
